# Supplementary material for: In Vitro and In Vivo Neuroprotective Effects of Stellettin B Through Anti-Apoptosis and the Nrf2/HO-1 Pathway
Source: PubMed Central journal article supplement (PMC6627894; doi:10.3390/md17060315), 2019-05-29
Supplement: marinedrugs-17-00315-s001.pdf [file marinedrugs-17-00315-s001.pdf]

## Supplementary Materials:

# In Vitro and In Vivo Neuroprotective Effects of Stellettin B Through Anti-Apoptosis and the Nrf2/HO-1 Pathway

Chien-Wei Feng <sup>1,2,†</sup>, Nan-Fu Chen <sup>3,4,†</sup>, Zhi-Hong Wen <sup>2,5,†</sup>, Wen-Ya Yang <sup>2</sup>, Hsiao-Mei Kuo <sup>2,6</sup>, Ping-Jyun Sung <sup>1,2,7</sup>, Jui-Hsin Su <sup>1,7</sup>, Shu-Yu Cheng <sup>5,8,9</sup> and Wu-Fu Chen <sup>2,9,10,\*</sup>

<sup>1</sup> National Museum of Marine Biology and Aquarium, Pingtung 944, Taiwan; qscjuejuejue@gmail.com (C.-W. F.); pjsung@nmmba.gov.tw (P.-J. S.); [x2219@nmmba.gov.tw](mailto:x2219@nmmba.gov.tw) (J.-H. S.)

<sup>2</sup> Department of Marine Biotechnology and Resources, National Sun Yat-sen University, Kaohsiung 804, Taiwan; wzh@mail.nsysu.edu.tw (Z.-H. W.); s8222889@gmail.com (W.-Y. Y.); hsiaomeikuo@gmail.com (H.-M. K.)

<sup>3</sup> Division of Neurosurgery, Department of Surgery, Kaohsiung Armed Forces General Hospital, Kaohsiung 802, Taiwan; [chen06688@gmail.com](mailto:chen06688@gmail.com) (N.-F. C.)

<sup>4</sup> Department of Neurological Surgery, Tri-Service General Hospital, National Defense Medical Center, Taipei 114, Taiwan

<sup>5</sup> Doctoral Degree Program in Marine Biotechnology, National Sun Yat-sen University, Kaohsiung 804, Taiwan; joygetit@gmail.com (S.-Y. C.)

<sup>6</sup> Center for Neuroscience, National Sun Yat-Sen University, Kaohsiung 804, Taiwan

<sup>7</sup> Graduate Institute of Marine Biology, National Dong Hwa University, Pingtung 944, Taiwan

<sup>8</sup> Doctoral Degree Program in Marine Biotechnology, Academia Sinica, Nankang, Taipei 115, Taiwan

<sup>9</sup> Department of Neurosurgery, Kaohsiung Chang Gung Memorial Hospital and Chang Gung University College of Medicine, Kaohsiung 833, Taiwan

\* Correspondence: [ma4949@cgmh.org.tw](mailto:ma4949@cgmh.org.tw); Tel.: 886-7-731-7123 (8011)

† These authors contributed equally to this work.

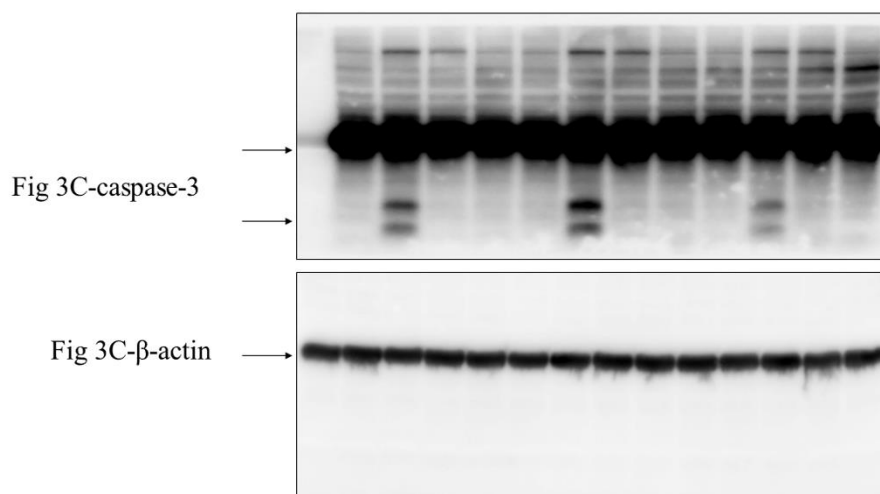

Figure S1: Uncropped Western blots of Fig 3C: caspase-3 and  $\beta$ -actin

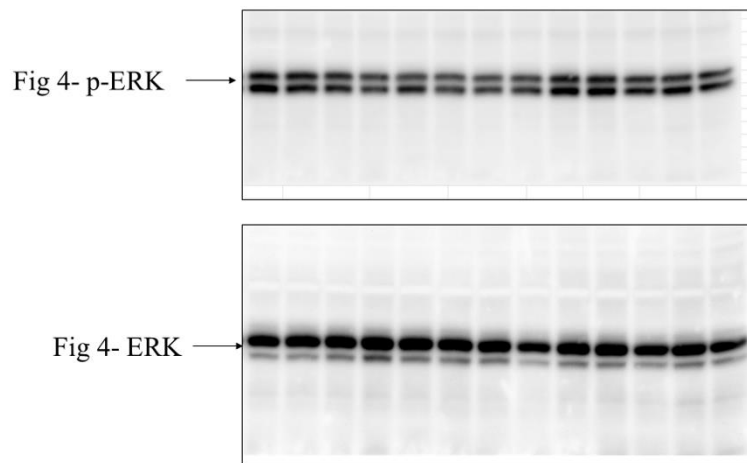

Figure S2: Uncropped Western blots of Fig 4: p-ERK and ERK

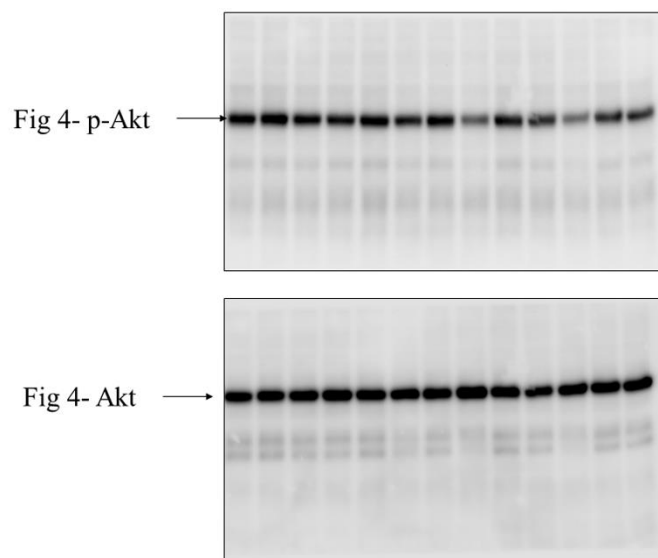

Figure S3: Uncropped Western blots of Fig 4: p-Akt and Akt

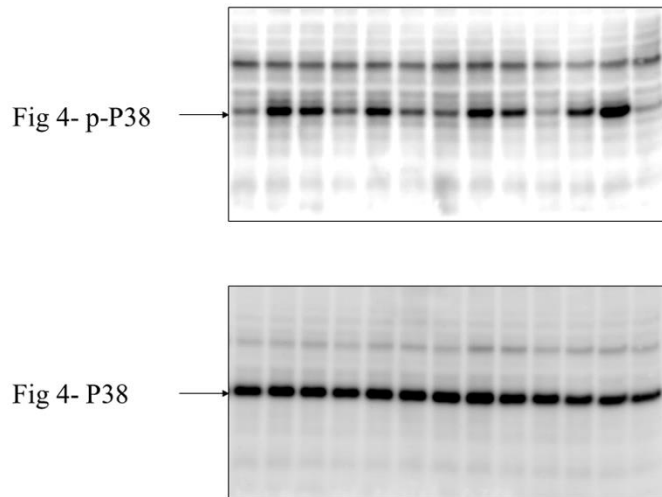

Figure S4: Uncropped Western blots of Fig 4: p-P38 and P38

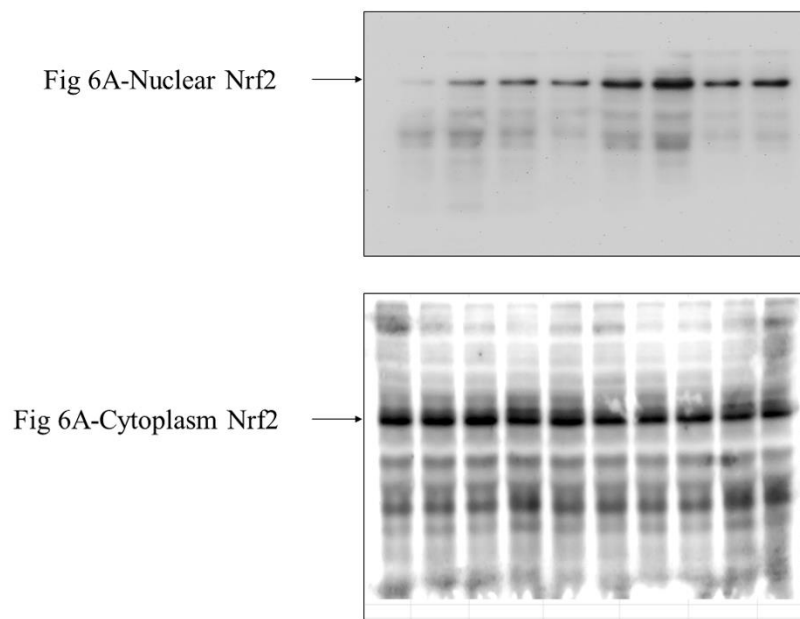

Figure S5: Uncropped Western blots of Fig 6A: Nuclear-Nrf2 and Cytoplasm-Nrf2

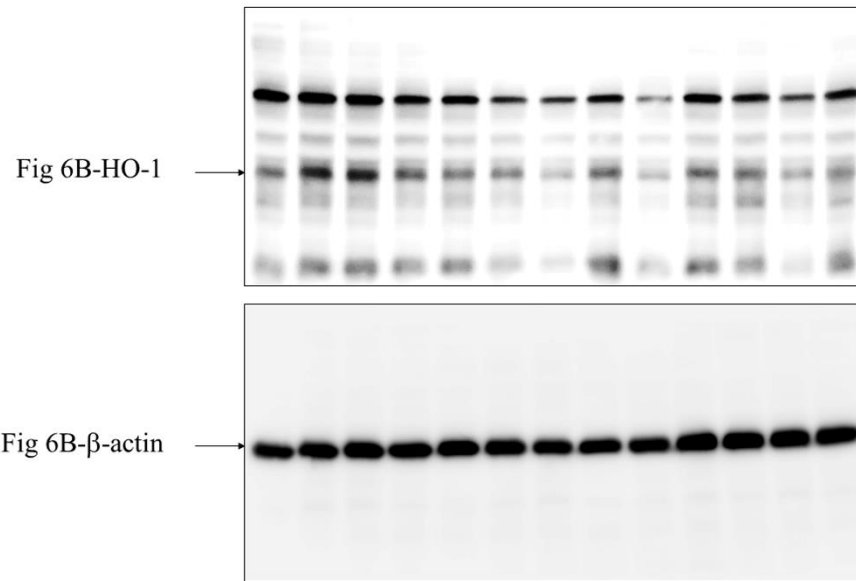

Figure S6: Uncropped Western blots of Fig 6B: HO-1 and  $\beta$ -actin

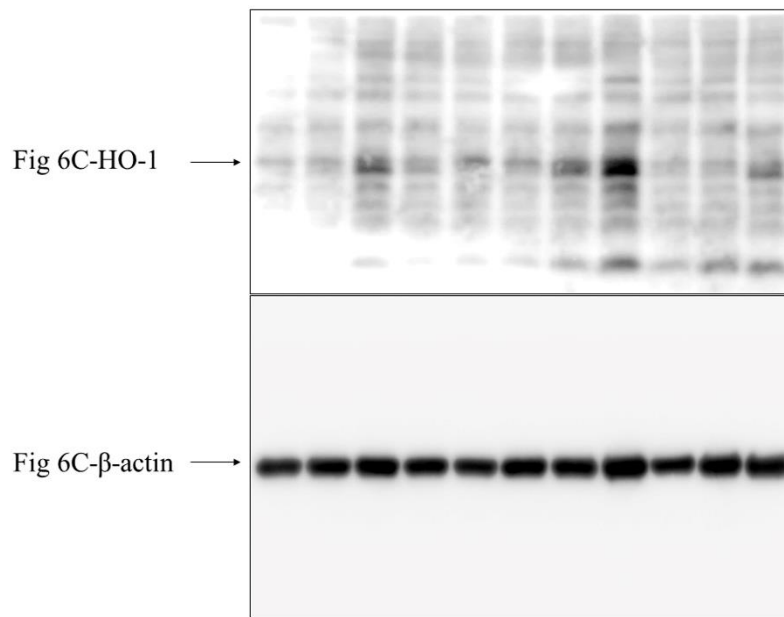

Figure S7: Uncropped Western blots of Fig 6C: HO-1 and  $\beta$ -actin

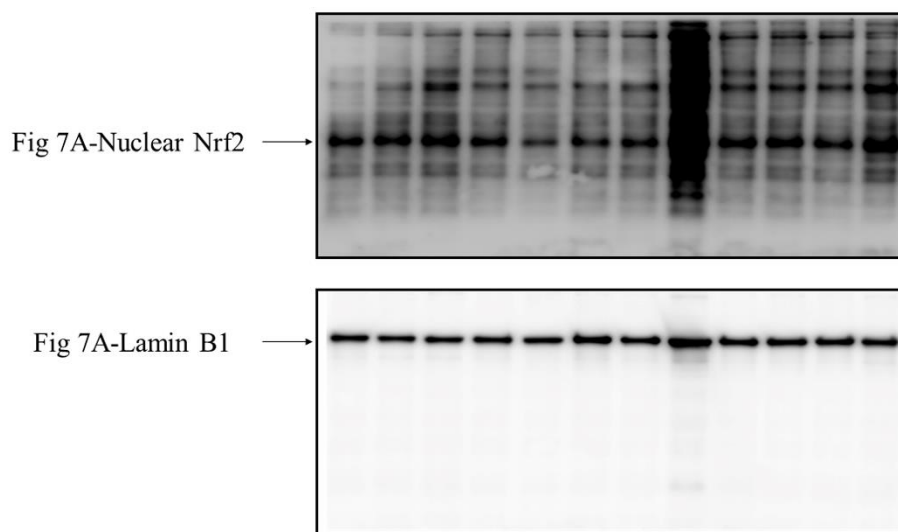

Figure S8: Uncropped Western blots of Fig 7A: Nuclear-Nrf2 and Lamin b1

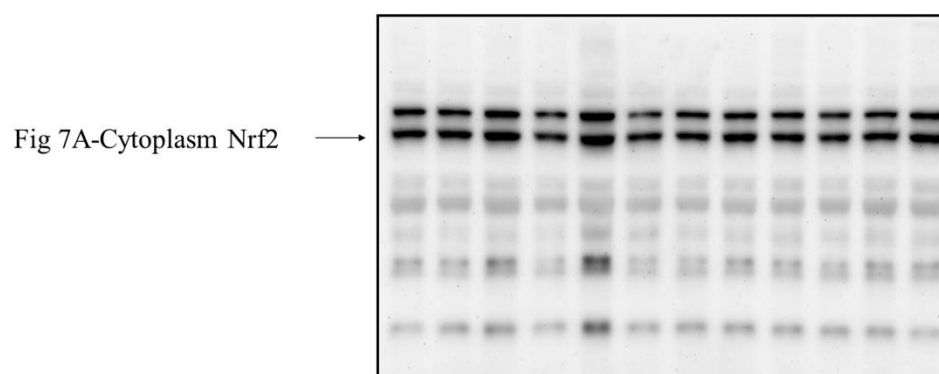

Figure S9: Uncropped Western blots of Fig 7A: Cytoplasm-Nrf2

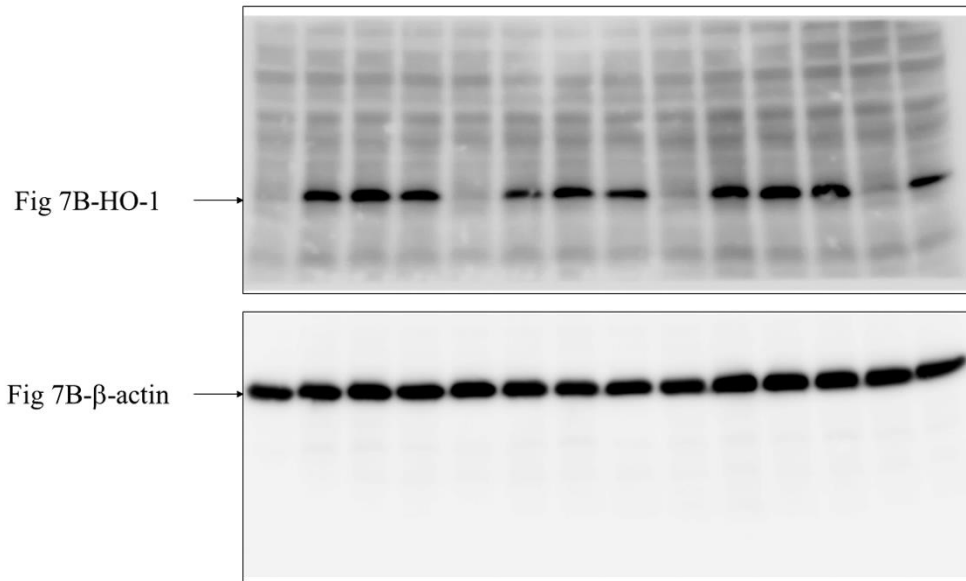

Figure S10: Uncropped Western blots of Fig 7B: HO-1 and  $\beta$ -actin

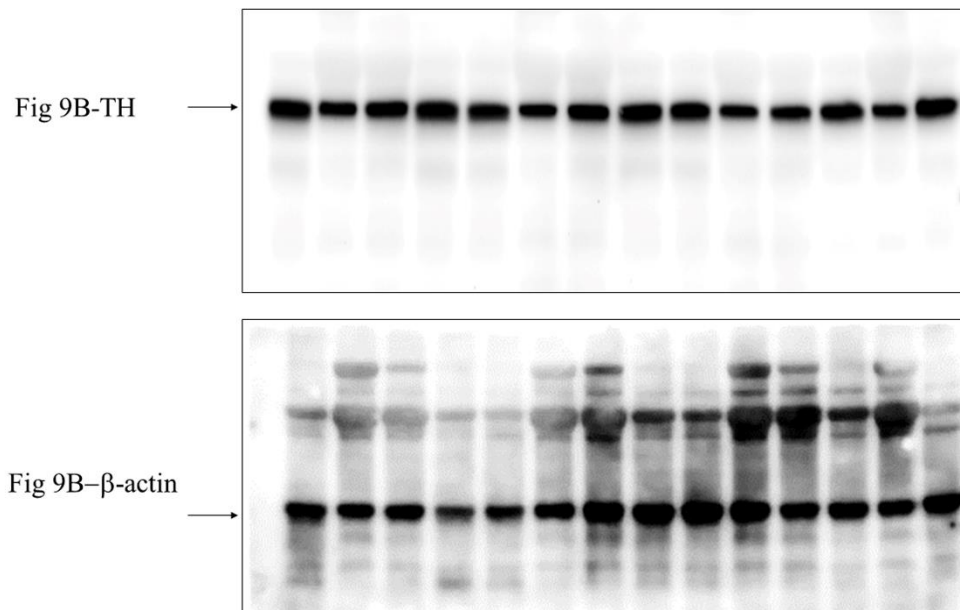

Figure S11: Uncropped Western blots of Fig 9B: TH and  $\beta$ -actin
